# Supplementary material for: Glucono-δ-lactone controlled assembly of graphene oxide hydrogels with selectively reversible gel–sol transition
Source: Royal Society of Chemistry journal article supplement (doi:10.1039/c2sm25090j), 2012-01-01
Supplement: c2sm25090j.pdf [file c2sm25090j.pdf]

## Electronic Supplementary Information:

Glucono- $\delta$ -lactone controlled assembly of graphene oxide hydrogels with selectively reversible gel-sol transition

Huan Huang, Shaoyi Lü, Xuetong Zhang\* and Ziqiang Shao

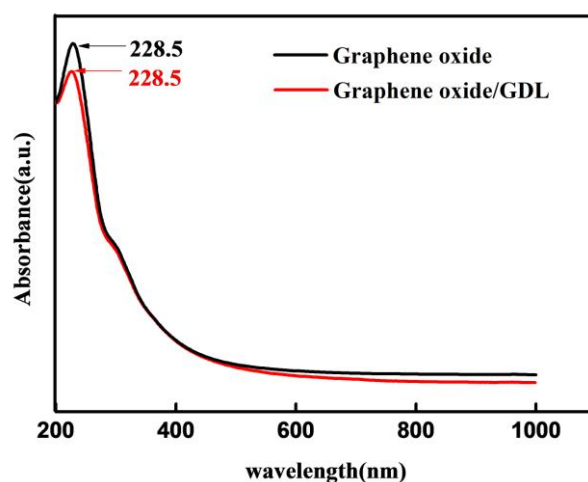

**Fig. S1** UV-Vis spectra of GO and its mixture with GDL.

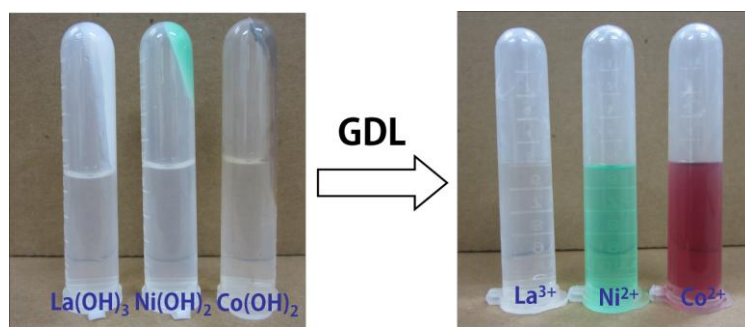

**Fig. S2** Precipitations obtained with centrifugation of  $\text{La}(\text{OH})_3$ ,  $\text{Ni}(\text{OH})_2$ , and  $\text{Co}(\text{OH})_2$  suspensions were totally dissolved after introduction of enough amounts of GDL after 24 hours.

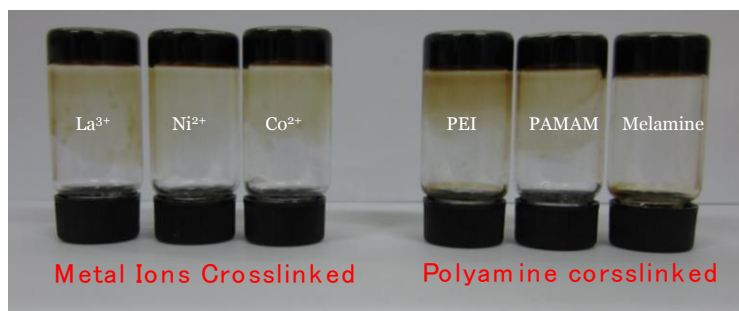

**Fig. S3** Digital photos of GO hydrogels with different crosslinkers

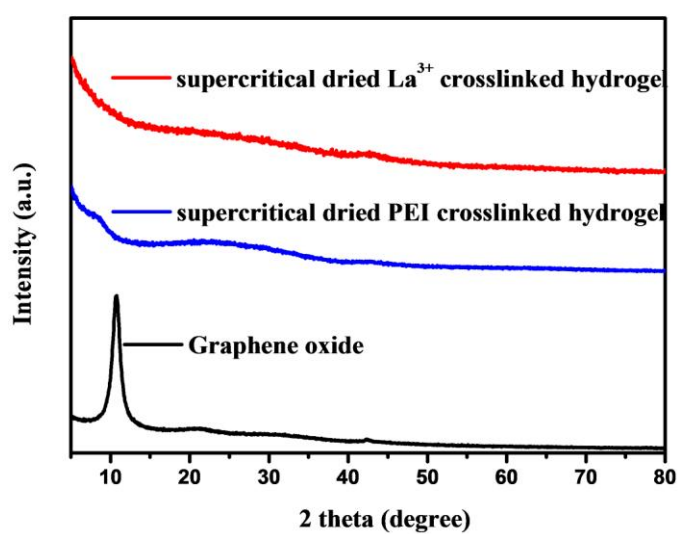

**Fig. S4** XRD patterns of supercritical dried  $\text{La}^{3+}$  and PEI cross-linked GO hydrogels.
